# Supplementary material
Source: PubMed Central journal article supplement (PMC3871198)
Supplement: NIHMS523023-supplement-01.pdf [file NIHMS523023-supplement-01.pdf]

| <b>EXPERIMENT 1<br/>PRETEST TRIALS: HBR</b> |                | <b>CONDITION</b>                                     |                                                  |
|---------------------------------------------|----------------|------------------------------------------------------|--------------------------------------------------|
| <b>Neural Region</b>                        | <b>Channel</b> | <b>Pound-Pour<br/>Green ball-Red ball<br/>N = 17</b> | <b>Motion<br/>Green ball-Red ball<br/>N=17</b>   |
| T3                                          | 1              | .0019 (.006)                                         | .0001 (.006)                                     |
|                                             | 2              | .0004 (.002)                                         | - .0001 (.004)                                   |
|                                             | 3              | -.0005 (.004)                                        | -.0004 (.004)                                    |
| T5                                          | 4              | .0005 (.003)                                         | -.0006 (.003)                                    |
|                                             | 5              | -.0005 (.003)                                        | -.0002 (.002)                                    |
| P3                                          | 6              | .0016 (.005)                                         | -.0002 (.005)                                    |
|                                             | 7              | .0015 (.007)                                         | .0007 (.006)                                     |
| O1                                          | 8              | -.0007 (.002)                                        | -.0005 (.001)                                    |
|                                             | 9              | -.0011 (.002)                                        | -.0008 (.002)                                    |
| <b>EXPERIMENT 1<br/>TEST TRIALS: HBR</b>    |                | <b>CONDITION</b>                                     |                                                  |
| <b>Neural Region</b>                        | <b>Channel</b> | <b>Pound-Pour<br/>Green ball-Red ball<br/>N = 17</b> | <b>Motion<br/>Green ball-Red ball<br/>N = 17</b> |
| T3                                          | 1              | .0002 (.003)                                         | .0014 (.004)                                     |
|                                             | 2              | -.0007 (.002)                                        | .0003 (.003)                                     |
|                                             | 3              | -.0001 (.003)                                        | .0002 (.002)                                     |
| T5                                          | 4              | .0009 (.003)                                         | .0022 (.009)                                     |
|                                             | 5              | -.00003 (.001)                                       | .0002 (.002)                                     |
| P3                                          | 6              | .0006 (.004)                                         | -.0015 (.004)                                    |
|                                             | 7              | -.0007 (.003)                                        | -.0027 (.005)                                    |
| O1                                          | 8              | -.0003 (.001)                                        | -.0007 (.001)                                    |
|                                             | 9              | -.0004 (.002)                                        | -.0003 (.002)                                    |

| EXPERIMENT 2<br>TEST TRIALS: HBR |         | CONDITION                     |                                 |
|----------------------------------|---------|-------------------------------|---------------------------------|
| Neural Region                    | Channel | Green ball-Red ball<br>N = 17 | Green ball-Green ball<br>N = 17 |
| T3                               | 1       | .0002 (.003)                  | .0014 (.004)                    |
|                                  | 2       | -.0007 (.002)                 | .0003 (.003)                    |
|                                  | 3       | -.0001 (.003)                 | .0002 (.002)                    |
| T5                               | 4       | .0009 (.003)                  | .0022 (.009)                    |
|                                  | 5       | -.00003 (.001)                | .0002 (.002)                    |
| P3                               | 6       | .0006 (.004)                  | -.0015 (.004)                   |
|                                  | 7       | -.0007 (.003)                 | -.0027 (.005)                   |
| O1                               | 8       | -.0003 (.001)                 | -.0007 (.001)                   |
|                                  | 9       | -.0004 (.002)                 | -.0003 (.002)                   |
